# Supplementary material
Source: PubMed Central journal article supplement (PMC5396534)
Supplement: 10-1055-s-0041-109717-sup_gf1001.pdf [file 10-1055-s-0041-109717-sup_gf1001.pdf]

# Adrenogenitales Syndrom mit 21-Hydroxylase-Defekt (AGS) – Stellungnahme zur pränatalen Therapie. Leitlinie der DGKED\* mit Beteiligung der DGGG (S1-Level, AWMF-Registernummer 174/013, Juli 2015)

Experts' Opinion on the Prenatal Therapy of Congenital Adrenal Hyperplasia (CAH) Due to 21-Hydroxylase Deficiency – Guideline of DGKED in cooperation with DGGG (S1-Level, AWMF Registry No. 174/013, July 2015)

## Autoren

H. G. Dörr<sup>1</sup>, G. Binder<sup>2</sup>, N. Reisch<sup>3</sup>, U. Gembruch<sup>4</sup>, P. G. Oppelt<sup>5</sup>, P. Wieacker<sup>6</sup>, J. Kratzsch<sup>7</sup>

## Institute

Die Institutsangaben sind am Ende des Beitrags gelistet.

## Schlüsselwörter

- AGS
- pränatale Therapie
- Dexamethason
- Off-Label-Use

## Key words

- CAH
- prenatal therapy
- dexamethasone
- off-label use

## Zusammenfassung

**Ziel:** Diese Leitlinie der Deutschen Gesellschaft für Kinderendokrinologie und -diabetologie (DGKED) e.V. unter Beteiligung mehrerer Fachgesellschaften wie der DGGG wurde als Stellungnahme von Experten zum derzeitigen Stand der pränatalen Therapie des Adrenogenitalen Syndroms mit 21-Hydroxylasedefekt konzipiert. Sie soll den beteiligten Ärzten als Orientierungshilfe bei der Entscheidung dienen, um betroffene Familien bei der pränatalen Therapie besser beraten zu können.

**Methoden:** Die von den beteiligten Fachgesellschaften beauftragten Experten entwickelten in einem informellen Prozess einen Konsensus. Anschließend wurde der Konsensus von den Vorständen der beteiligten Fachgesellschaften bestätigt.

**Empfehlungen:** Die pränatale AGS-Therapie ist eine experimentelle Therapie. Für die pränatale Diagnostik und Therapie sollen standardisierte Protokolle entworfen und verwendet werden. Dies gilt auch für die Langzeitnachsorge der Frauen und Kinder, die pränatal mit Dexamethason behandelt wurden. Wenn die Langzeitnachsorge der Kinder nicht gewährleistet ist, dann soll auch keine pränatale Therapie durchgeführt werden.

## Abstract

**Purpose:** This guideline of the German Society of Pediatric Endocrinology and Diabetology (DGKED) is designed to be experts' opinion on the current concept of prenatal therapy for congenital adrenal hyperplasia due to 21-hydroxylase deficiency (CAH). Several scientific medical societies have also participated in the guideline. It aims to offer guidance to physicians when they counsel affected families about prenatal therapy.

**Methods:** The experts commissioned by the medical societies developed a consensus in an informal process. The consensus was subsequently confirmed by the steering committees of the respective medical societies.

**Recommendations:** Prenatal CAH therapy is an experimental therapy. We recommend designing and using standardized protocols for the prenatal diagnosis, therapy and long-term follow-up of women and children treated prenatally with dexamethasone. If long-term follow-up is not possible, then prenatal therapy should not be performed.

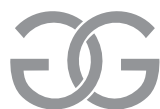

Deutsche Gesellschaft für  
**DGKED**  
für Kinderendokrinologie und -diabetologie

## Bibliografie

**DOI** <http://dx.doi.org/10.1055/s-0041-109717>  
Geburtsh Frauenheilk 2015; 75:  
1–7 © Georg Thieme Verlag KG  
Stuttgart · New York ·  
ISSN 0016-5751

## Korrespondenzadresse

**Prof. Dr. Helmuth G. Dörr**  
Kinder- und Jugendklinik  
Universitätsklinikum  
Erlangen-Nürnberg  
Loschgstraße 15  
91054 Erlangen  
Helmuth-Guenther.Doerr@  
uk-erlangen.de

## I Leitlinieninformationen

### Leitlinienprogramm

Informationen hierzu finden Sie am Ende der Leitlinie.

### Zitierweise

Experts' Opinion on the Prenatal Therapy of Congenital Adrenal Hyperplasia (CAH) Due to 21-Hydroxylase Deficiency – Guideline of DGKED in cooperation with DGGG (S1-Level, AWMF Registry No. 174/013, July 2015) Geburtsh Frauenheilk 2015; 75: 1232–1238

## Leitliniendokumente

Die vollständige Langfassung und den Leitlinienreport mit einer Aufstellung der Interessenkonflikte aller Autoren befinden sich auf der Homepage der AWMF:

<http://www.awmf.org/leitlinien/detail/II/174-013.html>

\* Deutsche Gesellschaft für Kinderendokrinologie und -diabetologie

Tab. 1 Autoren.

| Autor/in<br>Mandatsträger/in           | Fachgesellschaft/Organisation/Verein                                                |
|----------------------------------------|-------------------------------------------------------------------------------------|
| <b>koordinierender Leitlinienautor</b> |                                                                                     |
| Prof. Dr. Helmut-Günther Dörr          | Deutsche Gesellschaft für Kinderendokrinologie und -diabetologie e. V. (DGKED)      |
| <b>weitere Leitlinienautoren</b>       |                                                                                     |
| Prof. Dr. Gerhard Binder               | Deutsche Gesellschaft für Kinderendokrinologie und -diabetologie e. V. (DGKED)      |
| PD Dr. Nicole Reisch                   | Deutsche Gesellschaft für Endokrinologie e. V. (DGE)                                |
| Prof. Dr. Ulrich Gembruch              | Deutsche Gesellschaft für Gynäkologie und Geburtshilfe e. V. (DGGG)                 |
| PD Dr. Patricia G. Oppelt              | AG Kinder- und Jugendgynäkologie e. V.                                              |
| Prof. Dr. Peter Wieacker               | Deutsche Gesellschaft für Humangenetik e. V. (GfH)                                  |
| Prof. Dr. Jürgen Kratzsch              | Deutsche Vereinte Gesellschaft für Klinische Chemie und Laboratoriumsmedizin (DGKL) |
| <b>Leitliniensekretariat</b>           |                                                                                     |
| Dr. Anja Moß                           | Universitätsklinik für Kinder- und Jugendmedizin, Universität Ulm                   |

## Autoren

Siehe **Tab. 1**.

## Abkürzungen

|         |                                                             |
|---------|-------------------------------------------------------------|
| AGS     | Adrenogenitales Syndrom mit 21-Hydroxylasedefekt            |
| APE/SPE | Arbeitsgemeinschaft/Sektion für Pädiatrische Endokrinologie |
| cffDNA  | zellfreie fetale DNA                                        |
| CVS     | Chorionzottenbiopsie                                        |
| DHEAS   | Dehydroepiandrosteron-Sulfat                                |
| KG      | Körpergewicht                                               |
| KOF     | Körperoberfläche                                            |
| NIPT    | Non invasive prenatal Testing                               |
| p. c.   | post conceptionem                                           |
| p. m.   | post menstruationem                                         |
| SS      | Schwangerschaft                                             |
| SSW     | Schwangerschaftswoche                                       |

## II Leitlinienverwendung

### Fragestellung und Ziele

Die pränatale Therapie des AGS wird seit vielen Jahren in Deutschland praktiziert, obwohl sie experimentell ist. Bisher gibt es keine offizielle Stellungnahme der beteiligten Fachgesellschaften, die diese Therapie und vor allem die Nachsorge der behandelten Patienten regelt. International nehmen die Kommentare zu, die sich gegen diese Therapie aussprechen. Diese Leitlinie soll den beteiligten Ärzten als Orientierungshilfe bei der Entscheidung dienen, um betroffene Familien bei der pränatalen Therapie besser beraten zu können.

### Versorgungsbereich

Ärzte und Ärztinnen im niedergelassenen Bereich und in spezialisierten Kliniken.

### Adressaten

Zielgruppe sind Ärzte aus den Bereichen Genetik, Gynäkologie, Geburtshilfe, Internistische und Pädiatrische Endokrinologie. Patientenzielgruppe: geplante Schwangerschaft in Familien mit einem Kind mit klassischem AGS (Index-Fall), bei heterozygoten und homozygoten Genträgern für das klassische AGS und bei

compound-heterozygoten Genträgern für das nicht klassische AGS.

### Gültigkeitsdauer

Die Gültigkeit dieser Leitlinie wurde durch die Vorstände/Verantwortlichen der beteiligten Fachgesellschaften/Arbeitsgemeinschaften/Organisationen/Vereine sowie durch den Vorstand der DGGG und der DGGG-Leitlinienkommission im Juli 2015 bestätigt und damit in ihrem gesamten Inhalt genehmigt. Diese Leitlinie besitzt eine Gültigkeitsdauer vom 01.07.2015 bis 01.07.2016. Diese Dauer ist aufgrund der inhaltlichen Zusammenhänge geschätzt.

## III Leitlinie

### 1 Methodik

Am 01.09.2013 wurde die Leitlinie bei der AWMF angemeldet. Ein Entwurf der Leitlinie wurde im Konsens der Leitliniengruppe von den Professoren Dörr und Binder erstellt und dieser Entwurf per E-Mail an alle Beteiligten verschickt. Im E-Mail-Umlauf wurde dieser Entwurf von allen Autoren solange überarbeitet, bis Konsens in der Gruppe erreicht wurde.

### Verwendung existierender Leitlinien zum Thema

Beim Leitlinien-Erstellungsprozess wurden die vorhandenen themenrelevanten Leitlinien Nr. 027/022, 027/047 und 078/015 verwendet.

### Externe Begutachtung und Verabschiedung

Diese Version der S1-Leitlinie wurde 5 Wochen (13.05.2014 – 16.06.2014) zur öffentlichen Diskussion im Internet (Webseite der DGKED e.V.) vorgestellt und die Mitglieder der beteiligten Fachgesellschaften informiert. Eingegangene Kommentare wurden gesammelt und von der Leitliniengruppe bearbeitet. Im Konsens wurden Änderungen im Leitlinientext vorgenommen. Alle Kommentierenden wurden über den Umgang mit eingegangenen Kommentaren informiert. Die finale Version der Leitlinie wurde in der Leitliniengruppe und im DGKED-Vorstand im September 2014 konsentiert. Im Anschluss fand die finale Verabschiedung durch die Vorstände der beteiligten Fachgesellschaften/Organisationen statt. Innerhalb dieses Prozesses hat der Vorstand der Deutschen Gesellschaft für Kinder- und Jugendmedizin (DGKJ) sein Mandat zurückgezogen bzw. der finalen Version der Leitlinie nicht zugestimmt. Nach mehreren klärenden Gesprä-

chen konnte weiterhin keine Zustimmung der DGKJ eingeholt werden. Daraufhin wurden die Vorstände der 5 anderen beteiligten Fachgesellschaften über den Sachverhalt informiert und die Wichtigkeit bzw. Notwendigkeit der S1-Handlungsempfehlung in der jetzt erarbeiteten Form hervorgehoben. Die positiven Rückmeldungen der 5 übrigen Fachgesellschaften gingen bis 01.07.2015 im Sekretariat der DGKED ein. Die finale Version der Leitlinie wurde am 02.07.2015 bei der AWMF eingereicht.

## 2 Vorwort

Es ist den Autoren klar, dass man keine evidenzbasierte Leitlinie zu einer nicht zugelassenen Therapie erstellen kann. Diese S1-Leitlinie ist somit eine Stellungnahme, die den derzeitigen Stand zu dieser Thematik zusammenfasst und Handlungsempfehlungen für das weitere Vorgehen gibt.

## 3 Präambel

Weibliche Neugeborene mit einem klassischen Adrenogenitalen Syndrom aufgrund eines angeborenen Defekts der 21-Hydroxylase (AGS) werden in der Regel mit einem intersexuellen äußeren Genitale geboren. Mit der pränatalen Therapie des AGS sollen folgende Ziele erreicht werden: Verhinderung der Virilisierung der weiblichen AGS-Feten, Verhinderung der Genitalkorrektur-Operationen (OP) und Verhinderung des psychosozialen Stresses, der für die Familie mit der Geburt eines Mädchens mit intersexuellem Genitale verbunden ist. Die aufwendige Genitalkorrektur-OP kann eigene OP-assoziierte Probleme mit sich bringen sowie ebenfalls psychosozialen Stress für die Betroffenen bedeuten.

Da die Differenzierung des weiblichen Genitales ab der 7. Woche post conceptionem (p. c.) beginnt, muss die Therapie unmittelbar nach Feststellung der Schwangerschaft begonnen werden. Da zu diesem Zeitpunkt bisher noch keine pränatale Diagnostik möglich war, mussten alle AGS-Risikoschwangerschaften zunächst ohne Kenntnis der Diagnose behandelt werden. Man verwendet Dexamethason, das von der Plazenta nicht metabolisiert werden kann; so wird daher ein maternofetaler Gradient von 1:1 erreicht. Dexamethason wird unmittelbar nach Feststellung der Schwangerschaft an die Frauen verabreicht, bei denen das Risiko erhöht ist, ein Kind mit klassischem AGS zu bekommen. Nur wenn die pränatale Diagnostik ergibt, dass der Fetus weiblich ist und ein klassisches AGS hat, wird die Therapie kontinuierlich bis zum Ende der Schwangerschaft fortgeführt. In allen anderen Fällen wird die pränatale Therapie beendet.

Die pränatale Therapie des AGS mit Dexamethason ist „Off-Label-Use“. Dennoch wird diese experimentelle Therapie seit 30 Jahren weltweit durchgeführt. Die bisherigen publizierten Ergebnisse zeigen, dass die pränatale Therapie, wenn sie richtig durchgeführt wird, die Vermännlichung des äußeren Genitales der Mädchen verhindern kann [1–5]. Die Therapie ist aufgrund des ethischen Dilemmas (Behandlung nicht betroffener Kinder) und aufgrund von Daten zu möglichen negativen emotionalen und kognitiven Folgen umstritten. Diese Daten stammen von Studien mit kleiner Fallzahl. Daher bedarf es hier dringend größerer Studien und eine Nachuntersuchung aller pränatal behandelten Kinder, um etwaige Nebenwirkungen im Sinne der fetalen Programmierung durch pränatales Dexamethason belegen oder ausschließen zu können. Die Therapie erfordert eine enge Kooperation aller beteiligten Ärzte, vor allem eines pränatal-medizinischen Zentrums mit der Humangenetik und Einholung einer schriftlichen Einwilligung nach ärztlicher Aufklärung. Die Betreuung der Schwangeren kann nur von Gynäkologen in enger Kooperation mit gynäkologischen und/oder internistischen En-

dokrinologen und mit ausgewiesenen pränatal-medizinischen Zentren durchgeführt werden.

Ein standardisiertes evidenzbasiertes Protokoll liegt für die pränatale Therapie in Deutschland nicht vor. Die Empfehlungen zur pränatalen Therapie beruhen auf empirischen Erfahrungen und Daten aus der Literatur. Eine sorgfältige Dokumentation der pränatalen Therapie sollte aber selbstverständlich sein. Zusätzlich müssen Protokolle zur Nachsorge der pränatal behandelten Kinder und Mütter entwickelt und umgesetzt werden.

## 4 Definition und Basisinformation

(siehe auch Leitlinien mit AWMF-Registernummer 027/022, 027/047 und 078/015)

Das klassische Adrenogenitale Syndrom mit 21-Hydroxylase-Defekt (CYP21A2) ist mit über 90% die häufigste Störung der Kortisolbiosynthese der Nebennierenrinde. Die Krankheit wird autosomal-rezessiv vererbt; das CYP21A2-Gen ist auf dem kurzen Arm des Chromosoms 6 in der HLA-III-Region in unmittelbarer Nachbarschaft zu einem homologen Pseudogen lokalisiert. Je nach Schwere des Gendefekts und der vorhandenen Restaktivität der 21-Hydroxylase tritt das AGS in 2 Verlaufsformen, als klassisches AGS und als nicht klassisches AGS, auf [6].

Weibliche Neugeborene mit klassischem AGS fallen bereits bei Geburt durch ein intersexuelles Genitale (Störung der Genitaldifferenzierung bei regelrechtem weiblichem Karyotyp) auf. Die Vermännlichung des äußeren Genitales beginnt bereits intrauterin. Das innere Genitale ist immer weiblich, d. h. Uterus und Ovarien sind angelegt. Der Schweregrad der Virilisierung wird nach Prader in verschiedene Stadien eingeteilt und reicht von der einfachen Klitorishypertrophie (Prader I) bis zur kompletten Fusion der Labioskrotalfalten mit einer phallusartig vergrößerten Klitoris und Extension der Urethra auf die Glans penis (Prader V). Bei Mädchen mit einem intersexuellen Genitale (ab Prader III) kommt eine Genitalkorrektur-Operation infrage.

Weibliche Neugeborene mit einem nicht klassischen AGS sind bei Geburt unauffällig und fallen gelegentlich präpubertär durch eine prämatüre Pubarche und/oder Akne auf. Während und nach Abschluss der Pubertät fallen die Mädchen durch eine Hyperandrogenämie, Zyklusstörungen und Infertilität auf.

## 5 Diagnostik

### 5.1 Vor einer Schwangerschaft

Betroffene Familien weisen zumeist einen Indexfall (vorheriges Kind mit AGS) auf. Selten kann auch eine Heterozygotie der Eltern ohne Indexfall bekannt sein. Bereits präkonzeptionell sollten eine eingehende humangenetische Beratung und eine molekulargenetische Diagnostik von Indexfall und Eltern erfolgen, ebenso eine interdisziplinäre Beratung über die Möglichkeit und das Vorgehen bei einer pränatalen Therapie. Die Eltern sollen in einem ausführlichen Gespräch darüber informiert werden, dass bei einem autosomal-rezessiven Erbgang das Risiko, an einem AGS zu erkranken, sowohl für den Jungen als auch für das Mädchen bei 1:4 liegt. Daraus folgt, dass bei zunächst noch unbekanntem Geschlecht des Kindes 7 von 8 Feten unnötig behandelt werden, d. h. 3 nicht zu behandelnde Mädchen und 4 nicht zu behandelnde Jungen, da auch ein erkrankter Junge keiner Behandlung bedarf. Die Familie muss über die Vorteile und über mögliche Nachteile (potenzielle Nebenwirkungen für Mutter und Kind; Erfahrungen bei Tieren und Menschen, Langzeitrisiken) der pränatalen Therapie und auch der pränatalen Diagnostik aufgeklärt werden.

Die Eltern müssen auch darüber aufgeklärt werden, dass es für die Therapie kein standardisiertes Protokoll gibt. Es liegen auch keine Protokolle für die Langzeitnachsorge für die ehemals pränatal behandelten Kinder (und auch der behandelten Frauen) in Deutschland vor und man muss daher auf Protokolle und Daten aus anderen Ländern wie Schweden und USA zurückgreifen [1, 7].

Alle molekulargenetischen Untersuchungen, aber auch die Gewinnung von fetaler DNA aus dem mütterlichen Blut sind diagnostische Maßnahmen und unterliegen den entsprechenden Vorschriften des Gendiagnostikgesetzes.

Mögliche Konstellationen, bei denen eine pränatale Therapie in Erwägung gezogen werden kann:

1. Familie mit betroffenem Kind (Indexfall) mit klassischem AGS (CYP21A2).
2. Nachgewiesene Heterozygotie für das klassische AGS bei den Eltern (ohne Indexfall).
3. Neue Partnerschaft eines Elternteils eines Kindes mit klassischem AGS bei nachgewiesenem Überträgerstatus bei dem/der neuen Partner/in für ein klassisches AGS.
4. Homozygotes oder compound-heterozygotes klassisches AGS eines Elternteils, während der andere Elternteil heterozygoter Genträger für ein klassisches AGS ist.

Wenn die künftigen Eltern jeweils unterschiedliche Mutationen haben und kein Indexfall in der Familie mit Compound-Heterozygotie für diese Mutationen vorliegt, kann die humangenetische Beratung erschwert sein.

**Beispiel:** Bei der Mutter liegt eine typische Mutation für das klassische AGS vor, während der Vater eine Mutation für das nicht klassische AGS hat (z. B. Exon 7 Val281Leu). In diesem Fall kann ein Kind compound-heterozygot für das AGS sein. Der Phänotyp folgt in der Regel dabei der Mutation, die eine höhere Restaktivität bedingt, also einem nicht klassischen AGS. Dies bedeutet, dass für diese Familie die pränatale Therapie nicht indiziert ist.

## 5.2 Pränatale Diagnostik

Die pränatale Diagnostik des AGS erfolgt bisher invasiv im Rahmen einer Chorionzottenbiopsie (CVS) in der ca. 11. Schwangerschaftswoche (SSW). Dabei wird durch molekulargenetische Methoden oder durch Chromosomenanalyse nach Kurzzeitzellkultur das Geschlecht des Kindes festgestellt. Im Falle eines weiblichen Karyotyps wird durch molekulargenetische Methoden untersucht, ob das erwartete Kind homozygot/compound-heterozygot oder heterozygot ist oder nur das Wildtyp-Allel aufweist. Grundsätzlich kann die molekulargenetische Pränataldiagnostik auch im Rahmen einer Amniozentese erfolgen. Da aber eine Amniozentese später (ab der 14. SSW) durchgeführt wird, ist die Pränataldiagnostik durch CVS vorzuziehen, um die Dauer einer unnötigen Einnahme von Dexamethason möglichst kurz zu halten. Das Risiko einer Fehlgeburt liegt bei der Amniozentese bei ca. 0,5–1% und bei der Chorionzottenbiopsie etwa bei 1%.

Kürzlich haben 2 voneinander unabhängige Publikationen zeigen können, dass die Geschlechtsdiagnostik mittels SRY-Test [8] und auch bereits eine korrekte Genotypisierung [9] mittels zellfreier fetaler DNA (cffDNA) aus dem mütterlichen Blut bei Risikoschwangerschaften mit AGS möglich ist. In der Arbeit von Tardy-Guidollet et al. war der SRY-Test ab der 5. Woche der Gestation (4 Wochen + 5 Tage) positiv. Damit konnte eine pränatale Therapie mit Dexamethason in 68% der männlichen Feten vermieden werden [8]. In der Arbeit von New et al. war der früheste Zeitpunkt der Diagnostik die 6. Gestationswoche: Nach dem Ergebnis

der Diagnostik konnte die pränatale Therapie noch vor der 9. Woche begonnen werden [9].

Die nicht invasive Geschlechtsdiagnostik aus cffDNA ist in Deutschland noch keine Routinediagnostik, wird aber bereits im Rahmen des NIPT (non invasive prenatal testing) ab der 7. SSW post menstruationem angeboten, da dann der fetale DNA-Anteil an der gesamten freien DNA aus dem mütterlichen Blut hoch genug sein soll (ca. 10%). Das Ergebnis liegt in der Regel nach einer Woche vor [10, 11].

## 6 Bisheriges experimentelles Therapiekonzept

Es gibt derzeit in Deutschland kein standardisiertes und von den beteiligten Fachgesellschaften akzeptiertes Therapieprotokoll. Da die Genitaldifferenzierung früh ab der 7. Woche p.c. beginnt, wurde die Therapie unmittelbar nach Feststellung der Schwangerschaft zunächst ohne Kenntnis der Diagnose begonnen.

Mittel der Wahl ist das Glukokortikoid Dexamethason, das von der Plazenta nicht metabolisiert werden kann; so wird ein maternofetaler Gradient von 1 : 1 erreicht [12]. Als Startdosis wird Dexamethason (Richtdosis: 20 µg/kgKG/d) aufgeteilt in 3 Einzeldosen über 24 h empfohlen [13, 14]. Diese Dosis wurde empirisch ermittelt, kontrollierte Studien zur optimalen Dosis und Therapiedauer liegen nicht vor.

Es gibt auch Publikationen, die mit einer niedrigen Dexamethason-Dosis die gleiche Wirkung erzielen konnten [15]. Man sollte daher die niedrigste mütterliche Dexamethason-Dosis wählen, bei der die fetale Nebenniere noch supprimiert ist.

Nur wenn der Fetus weiblich ist und ein klassisches AGS hat, wird die Therapie kontinuierlich fortgeführt. Ist der Fetus nicht Mutationsträger, heterozygot oder männlich, dann wurde bisher die Dexamethason-Dosis um 0,5 mg jeden 2. Tag reduziert.

Die Betreuung der Risikoschwangerschaft muss in enger Kooperation zwischen dem behandelnden Frauenarzt und einem pränatal-medizinischen und/oder endokrinologischen Zentrum erfolgen. Bislang wurde nach unserer Kenntnis folgendes Vorgehen in Deutschland praktiziert:

### Während der Schwangerschaft

Im Serum (ca. 2 ml) der Mutter: bei Therapiebeginn und dann im Abstand von 4 Wochen bis zum Termin Bestimmung von Cortisol (zum Nachweis der Suppression der mütterlichen NNR) sowie Bestimmung von Östriol (zum Nachweis der Suppression der fetalen NNR) [16]. Im schwedischen PREDEX-Protokoll wird DHEAS vor Beginn der Therapie (6. SSW p.m.) und dann alle 4 Wochen bis zur SSW 36 und Östriol in den SSW 16–36 gemessen [7]. Kontinuierliche Überwachung und Dokumentation der Risikoschwangerschaft (z. B. Blutdruck-, Gewichtskontrollen, Urinkontrollen).

### Geburt und postpartal

Post partum schrittweise Reduktion der Dexamethason-Dosis um 0,5 mg jeden 2. Tag bei der Mutter. Es empfiehlt sich Kontakt mit dem pädiatrischen Endokrinologen aufzunehmen, um das weitere diagnostische und therapeutische Vorgehen zu besprechen. Es ist nicht notwendig, das Neugeborene sofort in eine Kinderklinik zu verlegen.

### Beim Neugeborenen

Durchführung des Neugeborenen Screenings am 3. Lebenstag; zusätzlich venöse Blutabnahme für die Bestimmung von Serumelektrolyten, Astrup, 17-OHP, Androstendion, Testosteron und der Reninkonzentration. Einleitung der Therapie mit Hydrocorti-



son (12–15 mg/m<sup>2</sup> KOF; z. B. 2–1–1 mg/d) und mit Astonin H (Tabl. à 0,1 mg; z. B. ½ – ¼ – ½). Eine postnatale molekular-genetische Bestätigung der pränatalen Diagnose sollte angestrebt werden (evtl. schon durch Gewinnung von Nabelschnurblut).

### 6.1 Sicherheit für die Mutter

Zur pränatalen Therapie liegen zahlreiche Publikationen vor [2, 4, 7, 17–22]. Die größte Erfahrung hat die Arbeitsgruppe von Maria New (New York) [18, 20, 23–25]. Mütterliche Nebenwirkungen wie eine vermehrte Gewichtszunahme und/oder Striae und Ödeme wurden in Einzelfällen berichtet; sie waren aber nach Absetzen von Dexamethason reversibel. Insbesondere wurde weder ein arterieller Hochdruck noch ein Diabetes mellitus beobachtet [20, 26].

Die mittels Fragebogen in den USA befragten Mütter (n = 22) hatten sich fast alle (n = 20) positiv zur pränatalen Therapie geäußert und würden diese auch in einer nachfolgenden Schwangerschaft wieder machen [27]. Dieses Ergebnis steht im Gegensatz zu den Ergebnissen aus Schweden [28]. Von den mittels Fragebogen befragten Frauen (n = 23) wollten nur 70% bei einer erneuten SS die pränatale Therapie wiederholen.

### 6.2 Sicherheit für Fetus und Kind

Die pränatal behandelten Neugeborenen hatten bei Geburt alle normale Geburtsmaße. Fehlbildungen wie eine Lippen-Kiefer-Gaumenspalte wurden bisher nicht berichtet. Die postnatale Längenentwicklung verlief normal [26]. Die bisherigen Langzeitdaten, die mittels Fragebögen an die Eltern erhoben wurden (174 pränatal behandelte Kinder im Vergleich zu 313 unbehandelten Kindern, Alter 1 Monat bis 12 Jahre), zeigten keinerlei Unterschiede in der kognitiven, sozialen oder psychomotorischen Entwicklung [29]. In einer Folgestudie bei 140 Kindern im Alter von 5 bis 12 Jahren, wobei davon etwa 25 Kinder mit AGS pränatal behandelt wurden, zeigte sich, dass die pränatal behandelten AGS-Mädchen im Vergleich mit pränatal unbehandelten AGS-Mädchen in ihrem Verhalten weniger knabenhaft waren [30]. Hirvikoski et al. fanden bei pränatal behandelten Kindern mit AGS mittels standardisierter psychologischer Tests Defizite im verbalen Gedächtnis [31]. Eine Metaanalyse der bisherigen Publikationen konnte keine signifikanten Unterschiede im Verhalten der pränatal behandelten Kinder finden [32]. Bei einer Nachuntersuchung ehemals pränatal behandelter weiblicher AGS-Patienten (n = 8) wurde im Vergleich zu einer Kontrollgruppe (n = 15) ein Trend zu kognitiven Defiziten gefunden, wobei der Unterschied statistisch nicht signifikant war [33]. Eine Gruppe aus Warschau hat ebenfalls eine kleine Zahl von pränatal behandelten Mädchen (9 mit AGS und 8 ohne AGS) psychologisch nachuntersucht und gefunden, dass die pränatal behandelten AGS-Mädchen in allen kognitiven Tests am besten abschnitten [34].

### 6.3 Dexamethason im Tierversuch

Im Tierversuch wurden bei der Therapie mit Dexamethason Fehlbildungen wie z. B. Lippen-Kiefer-Spaltbildungen, Lungenhypoplasie oder Anenzephalus beschrieben [22]. Auch eine Leberverfettung (Ratte, Schafe, Primaten) sowie eine veränderte glomeruläre Filtrationsrate wurden beobachtet [35]. Berichte über Störungen der Gehirnentwicklung und verändertes Verhalten der behandelten Tiere liegen ebenfalls vor [36]. Erwachsene Nagetiere hatten nach pränataler Glukokortikoidtherapie einen arteriellen Hochdruck und eine Hyperglykämie mit erhöhten Insulinkonzentrationen [37, 38]. Bei den Nachkommen von Affen, die in der Schwangerschaft mit hohen Dosen Dexamethason (120 bzw.

200 µg/kgKG und Tag) therapiert wurden, fanden sich nach mildem Stress bereits erhöhte Cortisolspiegel, sowie im Alter von 12 Monaten ein erhöhter Blutdruck [39].

### 6.4 Dokumentation der pränatalen Therapie in Deutschland

Bereits 1990 wurde von der damaligen Arbeitsgemeinschaft/Sektion für Pädiatrische Endokrinologie (APE/SPE) beschlossen, dass die Fälle, die den Kinderendokrinologen bekannt sind, auch zentral (Kinder- und Jugendklinik der Universität Erlangen, Prof. Dr. H.-G. Dörr) dokumentiert werden. Eine finanzielle Unterstützung des Projekts war dabei nicht vorgesehen. Ein Fragebogen wurde entwickelt und zunächst an alle Pädiatrischen Endokrinologen unter der Vorstellung verschickt, dass diese von der Familie (mit Indexfall) auch über künftige Schwangerschaften informiert werden. Der Fragebogen wurde in den letzten Jahren überarbeitet und zuletzt eine Version für die betroffene Mutter/Familie und eine Version für den Arzt entwickelt, wobei der Arztfragebogen vom zuständigen Gynäkologen ausgefüllt werden soll. Die Fragebögen können auch über die Homepage der DGKED im Internet unter [www.paediatriische-endokrinologie.de](http://www.paediatriische-endokrinologie.de) und bei der AGS Selbsthilfegruppe (<https://www.ags-initiative.de/>) abgerufen werden bzw. werden auch auf Anfrage zur Verfügung gestellt.

Das Ausfüllen der Fragebögen erfolgt auf freiwilliger Basis. Eine genaue Analyse der bisher dokumentierten Daten ist in Deutschland nicht möglich, da die Fragebögen entweder überhaupt nicht oder fast nie komplett ausgefüllt wurden.

## 7 Ausblick

Die pränatale AGS-Therapie ist nach wie vor eine experimentelle Therapie. Die bisherigen Erfahrungen zeigen, dass die pränatale Therapie wirksam ist. Die pränatal therapierten weiblichen AGS-Neugeborenen haben ein äußerlich unauffälliges Genitale bzw. eine Genitale mit milder Virilisierung (Prader 1). Schwerwiegende Komplikationen wurden bisher bei den Müttern nicht berichtet, Fehlbildungen traten bei den Neugeborenen nicht auf [40]. Das ethische Dilemma bestand bisher darin, dass 7 von 8 Feten (4 männlich und 3 weiblich) unnötig mit Dexamethason behandelt wurden. Mit den neuen Ansätzen zur pränatalen Diagnostik über die Analyse der zellfreien DNA aus dem mütterlichen Blut wird es möglich sein, in Zukunft gezielt zunächst nur weibliche Feten oder sogar nur homozygote bzw. compound-heterozygote weibliche AGS-Feten zu behandeln.

Daten zu möglichen negativen emotionalen und kognitiven Folgen der ehemals behandelten Kinder mit AGS müssen ernst genommen werden. Diese Daten stammen allerdings aus Studien mit kleiner Fallzahl. Daher bedarf es hier dringend größerer Studien und eine Nachuntersuchung aller pränatal behandelten Kinder, um etwaige Nebenwirkungen im Sinne der fetalen Programmierung durch pränatales Dexamethason belegen oder ausschließen zu können. Für die pränatale Diagnostik und Therapie sollen standardisierte Protokolle entworfen und verwendet werden. Dies gilt auch für die Langzeitnachsorge der Frauen und Kinder, die pränatal mit Dexamethason behandelt wurden. Wenn die Langzeitnachsorge der Kinder nicht gewährleistet ist, dann soll auch keine pränatale Therapie durchgeführt werden.

Alle pränatalen AGS-Therapien sollen dokumentiert und zentral erfasst werden. Dabei sollen auch die Schwangerschaften erfasst werden, bei denen die Therapie nach Erhalt des Ergebnisses der pränatalen Diagnostik vorzeitig beendet wurde [6].

Die beteiligten Fachgesellschaften sollen sich auf ein Protokoll für die Therapie und Nachsorge einigen und dieses durch eine Ethikkommission beurteilen und bestätigen lassen.

### Institute

- <sup>1</sup> Kinder- und Jugendklinik des Universitätsklinikums Erlangen, Erlangen
- <sup>2</sup> Univ.-Kinderklinik Tübingen, Sektion Endokrinologie, Tübingen
- <sup>3</sup> Medizinische Klinik und Poliklinik IV, Klinikum der Universität München, München
- <sup>4</sup> Abteilung für Geburtshilfe und Pränatalmedizin der Universität Bonn, Bonn
- <sup>5</sup> Kinder- und Jugendgynäkologie, Frauenklinik des Universitätsklinikums Erlangen, Erlangen
- <sup>6</sup> Institut für Humangenetik, Universitätsklinikum Münster, Münster
- <sup>7</sup> Institut für Laboratoriumsmedizin, Klinische Chemie und Molekulare Diagnostik der Universität Leipzig, Leipzig

### Literatur

- 1 New MI. Prenatal treatment of congenital adrenal hyperplasia. The United States experience. *Endocrinol Metab Clin North Am* 2001; 30: 1–13
- 2 Forest MG, Betuel H, David M. Prenatal treatment in congenital adrenal hyperplasia due to 21-hydroxylase deficiency: up-date 88 of the French multicentric study. *Endocr Res* 1989; 15: 277–301
- 3 Forest MG, Dörr HG; on behalf of ESPE. Prenatal therapy in congenital adrenal hyperplasia due to 21-hydroxylase-deficiency: retrospective follow-up study of 253 treated pregnancies in 215 families. *Endocrinologist* 2003; 13: 252–259
- 4 New MI, Carlson A, Obeid J et al. Prenatal diagnosis for congenital adrenal hyperplasia in 532 pregnancies. *J Clin Endocrinol Metab* 2001; 86: 5651–5657
- 5 Wudy SA, Homoki J, Teller WM. Successful prenatal treatment of congenital adrenal hyperplasia due to 21-hydroxylase deficiency. *Eur J Pediatr* 1994; 153: 556–559
- 6 Speiser PW, Azziz R, Baskin LS et al. A summary of the Endocrine Society clinical practice guidelines on congenital adrenal hyperplasia due to steroid 21-hydroxylase deficiency. *Int J Pediatr Endocrinol* 2010; 2010: 494173
- 7 Lajic S, Nordenstrom A, Ritzen EM et al. Prenatal treatment of congenital adrenal hyperplasia. *Eur J Endocrinol* 2004; 151 (Suppl. 3): U63–U69
- 8 Tardy-Guidollet V, Menassa R, Costa JM et al. New management strategy of pregnancies at risk of congenital adrenal hyperplasia using fetal sex determination in maternal serum: French cohort of 258 cases (2002–2011). *J Clin Endocrinol Metab* 2014; 99: 1180–1188
- 9 New MI, Tong YK, Yuen T et al. Noninvasive prenatal diagnosis of congenital adrenal hyperplasia using cell-free fetal DNA in maternal plasma. *J Clin Endocrinol Metab* 2014; 99: E1022–E1030
- 10 Avent ND, Chitty LS. Non-invasive diagnosis of fetal sex; utilisation of free fetal DNA in maternal plasma and ultrasound. *Prenat Diagn* 2006; 26: 598–603
- 11 Meaney C, Norbury G. Non-invasive prenatal diagnosis. *Methods Mol Biol* 2011; 688: 155–172
- 12 Beck JC, Johnson JW. Maternal administration of glucocorticoids. *Clin Obstet Gynecol* 1980; 23: 93–113
- 13 Speiser PW. Prenatal treatment of congenital adrenal hyperplasia. *J Urol* 1999; 162: 534–536
- 14 Claahsen-van der Grinten HL, Stikkelbroeck NM, Otten BJ et al. Congenital adrenal hyperplasia—pharmacologic interventions from the prenatal phase to adulthood. *Pharmacol Ther* 2011; 132: 1–14
- 15 Coleman MA, Honour JW. Reduced maternal dexamethasone dosage for the prenatal treatment of congenital adrenal hyperplasia. *BJOG* 2004; 111: 176–178
- 16 Dörr HG, Sippell WG, Willig RP. [Prenatal diagnosis and therapy of adrenogenital syndrome with 21-hydroxylase deficiency]. *Geburtsh Frauenheilk* 1992; 52: 586–588
- 17 Forest MG, David M. Prenatal treatment of congenital adrenal hyperplasia due to 21-hydroxylase deficiency: a 10 year experience. *Indian J Pediatr* 1992; 59: 515–522
- 18 New MI. Vindication of prenatal diagnosis and treatment of congenital adrenal hyperplasia with low-dose dexamethasone. *Am J Bioeth* 2010; 10: 67–68
- 19 Nimkarn S, New MI. Prenatal diagnosis and treatment of congenital adrenal hyperplasia owing to 21-hydroxylase deficiency. *Nat Clin Pract Endocrinol Metab* 2007; 3: 405–413
- 20 Nimkarn S, New MI. Congenital adrenal hyperplasia due to 21-hydroxylase deficiency: a paradigm for prenatal diagnosis and treatment. *Ann N Y Acad Sci* 2010; 1192: 5–11
- 21 Hirvikoski T, Nordenstrom A, Wedell A et al. Prenatal dexamethasone treatment of children at risk for congenital adrenal hyperplasia: the Swedish experience and standpoint. *J Clin Endocrinol Metab* 2012; 97: 1881–1883
- 22 Miller WL, Witchel SF. Prenatal treatment of congenital adrenal hyperplasia: risks outweigh benefits. *Am J Obstet Gynecol* 2013; 208: 354–359
- 23 Mercado AB, Wilson RC, Cheng KC et al. Prenatal treatment and diagnosis of congenital adrenal hyperplasia owing to steroid 21-hydroxylase deficiency. *J Clin Endocrinol Metab* 1995; 80: 2014–2020
- 24 New MI. Prenatal treatment of congenital adrenal hyperplasia: author differs with technical report. *Pediatrics* 2001; 107: 804
- 25 New MI, Abraham M, Yuen T et al. An update on prenatal diagnosis and treatment of congenital adrenal hyperplasia. *Semin Reprod Med* 2012; 30: 396–399
- 26 Lajic S, Nordenstrom A, Hirvikoski T. Long-term outcome of prenatal treatment of congenital adrenal hyperplasia. *Endocr Dev* 2008; 13: 82–98
- 27 Trautman PD, Meyer-Bahlburg HF, Postelnek J et al. Mothers' reactions to prenatal diagnostic procedures and dexamethasone treatment of congenital adrenal hyperplasia. *J Psychosom Obstet Gynaecol* 1996; 17: 175–181
- 28 Lajic S, Wedell A, Bui TH et al. Long-term somatic follow-up of prenatally treated children with congenital adrenal hyperplasia. *J Clin Endocrinol Metab* 1998; 83: 3872–3880
- 29 Meyer-Bahlburg HF, Dolezal C, Baker SW et al. Cognitive and motor development of children with and without congenital adrenal hyperplasia after early-prenatal dexamethasone. *J Clin Endocrinol Metab* 2004; 89: 610–614
- 30 Meyer-Bahlburg HF, Dolezal C, Baker SW et al. Prenatal androgenization affects gender-related behavior but not gender identity in 5–12-year-old girls with congenital adrenal hyperplasia. *Arch Sex Behav* 2004; 33: 97–104
- 31 Hirvikoski T, Nordenstrom A, Lindholm T et al. Cognitive functions in children at risk for congenital adrenal hyperplasia treated prenatally with dexamethasone. *J Clin Endocrinol Metab* 2007; 92: 542–548
- 32 Merce Fernandez-Balsells M, Muthusamy K, Smushkin G et al. Prenatal dexamethasone use for the prevention of virilization in pregnancies at risk for classical congenital adrenal hyperplasia because of 21-hydroxylase (CYP21A2) deficiency: a systematic review and meta-analysis. *Clin Endocrinol (Oxf)* 2010; 73: 436–444
- 33 Meyer-Bahlburg HF, Dolezal C, Haggerty R et al. Cognitive outcome of offspring from dexamethasone-treated pregnancies at risk for congenital adrenal hyperplasia due to 21-hydroxylase deficiency. *Eur J Endocrinol* 2012; 167: 103–110
- 34 Maryniak A, Ginalska-Malinowska M, Bielawska A et al. Cognitive and social function in girls with congenital adrenal hyperplasia – Influence of prenatally administered dexamethasone. *Child Neuropsychol* 2014; 20: 60–70
- 35 Khulan B, Drake AJ. Glucocorticoids as mediators of developmental programming effects. *Best Pract Res Clin Endocrinol Metab* 2012; 26: 689–700
- 36 National Council on Nutrition and Physical Activity in Norway. Extract from the Norwegian National Report on Physical Activity and Health. *Scand J Med Sci Sports* 2001; 11: 255–257
- 37 Seckl JR. Glucocorticoid programming of the fetus; adult phenotypes and molecular mechanisms. *Mol Cell Endocrinol* 2001; 185: 61–71
- 38 Seckl JR, Miller WL. How safe is long-term prenatal glucocorticoid treatment? *JAMA* 1997; 277: 1077–1079
- 39 de Vries A, Holmes MC, Heijnen A et al. Prenatal dexamethasone exposure induces changes in nonhuman primate offspring cardiometabolic and hypothalamic-pituitary-adrenal axis function. *J Clin Invest* 2007; 117: 1058–1067
- 40 Vos AA, Bruinse HW. Congenital adrenal hyperplasia: do the benefits of prenatal treatment defeat the risks? *Obstet Gynecol Surv* 2010; 65: 196–205

**Leitlinienprogramm**

**Herausgeber**  
Federführende Fachgesellschaften

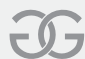

**Deutsche Gesellschaft für Gynäkologie und Geburtshilfe e. V. (DGGG)**  
Repräsentanz der DGGG und Fachgesellschaften  
Hausvogteiplatz 12  
DE-10117 Berlin  
info@dggg.de  
<http://www.dggg.de/>

**Präsident der DGGG**  
Prof. Dr. med. Diethelm Wallwiener  
Universitätsfrauenklinik Tübingen  
Calwerstraße 7  
DE-72076 Tübingen

**DGGG-Leitlinienbeauftragter**  
Prof. Dr. med. Matthias W. Beckmann  
Universitätsklinikum Erlangen  
Frauenklinik  
Universitätsstraße 21–23  
DE-91054 Erlangen

**Leitlinienkoordination**  
Dr. med. Paul Gaß, Tobias Brodkorb, Marion Gebhardt  
Universitätsklinikum Erlangen  
Frauenklinik  
Universitätsstraße 21–23  
DE-91054 Erlangen  
fk-dggg-leitlinien@uk-erlangen.de  
<http://www.dggg.de/leitlinienstellungennahmen>

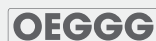

**Österreichische Gesellschaft für Gynäkologie und Geburtshilfe (OEGGG)**  
Innrain 66A/5. Stock  
AT-6020 Innsbruck  
stephanie.leutgeb@oeggg.at  
<http://www.oeggg.at>

**Präsident der OEGGG**  
Prof. Dr. med. Uwe Lang  
Universitätsklinik für Frauenheilkunde und Geburtshilfe Graz  
Auenbruggerplatz 14  
AT-8036 Graz

**OEGGG-Leitlinienbeauftragter**  
Prof. Dr. med. Karl Tamussino  
Universitätsklinik für Frauenheilkunde und Geburtshilfe Graz  
Auenbruggerplatz 14  
AT-8036 Graz

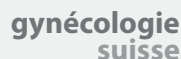

**Schweizerische Gesellschaft für Gynäkologie und Geburtshilfe (SGGG)**  
Gynécologie Suisse SGGG  
Altenbergstraße 29  
Postfach 6  
CH-3000 Bern 8  
sekretariat@sggg.ch  
<http://www.sggg.ch/>

**Präsident der SGGG**  
Dr. med. David Ehm  
FMH für Geburtshilfe und Gynäkologie  
Nägeligasse 13  
CH-3011 Bern

**SGGG-Leitlinienbeauftragter**  
Prof. Dr. med. Daniel Surbek  
Universitätsklinik für Frauenheilkunde  
Geburtshilfe und feto-maternale Medizin  
Inselspital Bern  
Effingerstraße 102  
CH-3010 Bern
